# Supplementary material for: Construction of Prognostic Prediction Model for Stomach Adenocarcinoma Based on the TCGA Database.
Source: Research Square preprint supplement (doi:10.21203/rs.3.rs-114928/v1), 2020-12-04
Supplement: Supplementary file 1 [file 883472a9ae7187756b6d188c.docx]

**Construction of prognostic prediction model for stomach adenocarcinoma based on the TCGA database**

Author name: Zhengzhong Gu1 , Xiaohan Cui2, Xudong Wang#1

1Author affiliations: Department of Gastrointestinal Nutrition and Hernia Surgery, The Second Hospital of Jilin University, Changchun, 130041, Jilin , P.R. China;

2Author affiliations: Department of General Surgery, the Affiliated Changzhou No. 2 People’s Hospital of Nanjing Medical University, Changzhou, 213000, Jiangsu, P.R. China.

Correspondence to Xudong Wang#

Department of Gastrointestinal Nutrition and Hernia Surgery, The Second Hospital of Jilin University, No 218, Ziqiang Street, Changchun, 130041, Jilin, P.R. China.

Tel : 13514406378

Email : [wangxudong1971@126.com](mailto:wangxudong1971@126.com)

Supplementary Table 1 Primers and SiRNA sequences used in this research (5’-3’)

| Name | Sequence |
| --- | --- |
| FTO Forward | 5′-GCCGCTGCTTGTGAGACCTTC-3′ |
| FTO Reverse | 5′-ACTGCCACCGCTGACCTGTC-3′ |
| GAPDH forward | 5′-AAGGTGAAGGTCGGAGTCAAC-3′ |
| GAPDH reverse | 5′-GGGGTCATTGATGGCAACAATA-3′ |
